# Supplementary material for: Multi-featured collective perception with Evidence Theory: tackling spatial correlations
Source: Springer Nature journal article supplement (doi:10.1007/s11721-021-00192-8), 2021-05-22
Supplement: MOESM1 [file 19188854]

## Supplementary Material of the Manuscript “Multi-Featured Collective Perception with EvidenceTheory: Tackling Spatial Correlations”

Palina Bartashevich · Sanaz Mostaghim

Received: date / Accepted: date

### Multi-Featured Benchmark Generator

The environmental grid is not predefined and is generated each simulation upon the desired pattern type (Bartashevich and Mostaghim, 2019). To construct the multi-featured environment with  $n > 2$  colours, a colour ratio parameter  $\rho$  has to be defined prior to the pattern generation. For a binary case with  $n = 2$  colours, the parameter  $\rho$  was identified as a ratio of black cells to the white ones, given that white is a prevailing colour. For instance, the parameter’s values  $\rho \in \{0.67, 0.93\}$  correspond to an easier (i.e., 40% black and 60% white) and the most difficult (i.e., 48% black and 52% white) cases, respectively.

In case of multiple features ( $n > 2$ ), for the environment with colour proportions  $\vec{f}_\Omega = (f_{\omega_1}, \dots, f_{\omega_n})$ , we define  $\rho(\vec{f}_\Omega)$  as  $\rho(\vec{f}_\Omega) := 1 - gini(\vec{f}_\Omega)$ , where:

$$gini(\vec{f}_\Omega) = \frac{1}{n-1} \left( n+1 - 2 \cdot \left( \sum_{i=1}^n \sum_{j=1}^i f_{\omega_j} \right) \cdot \left( \sum_{i=1}^n f_{\omega_i} \right)^{-1} \right) \quad (1)$$

and  $f_{\omega_i}$  indicates either a ratio or the amount of cells with a specific colour  $\omega_i \in \Omega$  in the whole environment, such that  $f_{\omega_i} \leq f_{\omega_{i+1}}$ . Here, the Gini coefficient  $gini(\cdot) \in [0, 1]$  is a measure of the degree of inequality in a distribution (Gini, 1921), indicating how a given feature distribution  $\vec{f}_\Omega$  differs from a totally equal one. That is,  $gini(\vec{f}_\Omega)$  equals zero in the case when there is an equal amount of all the features, and equals one when there is a definitive distinguish, i.e., complete inequality.

---

Palina Bartashevich  
Faculty of Computer Science  
Otto von Guericke University  
Magdeburg, Germany  
E-mail: palina.bartashevich@ovgu.de

To keep consistent with the difficulty levels of  $\rho$  for the binary case, i.e.,  $\rho \in \{0.67, 0.93\}$ , we need to define colour proportions  $\vec{f}_\Omega$  also for  $n > 2$  in such a way that  $\rho(\vec{f}_\Omega) \in \{0.67, 0.93\}$  regardless of the vector's length  $|\vec{f}_\Omega| = n$ . According to our definition of  $\rho(\vec{f}_\Omega)$ , where  $\text{gini}(\vec{f}_\Omega) = 1 - \rho(\vec{f}_\Omega)$ , the easiest case of  $\rho(\vec{f}_\Omega) = 0.67$  corresponds then to the Gini value of 0.33, indicating some level of colour disproportion. While  $\rho(\vec{f}_\Omega) = 0.93$  implies almost equal colour distribution as intended, since the Gini value is approaching zero in this case, i.e.,  $\text{gini}(\vec{f}_\Omega) = 0.07$ . For instance, in the case of  $n = 3$  and  $\rho(\vec{f}_\Omega) = 0.67$ , the vector of colour ratios is then defined as follows:  $\vec{f}_\Omega = (0.17, 0.33, 0.5)$ .

## References

- Bartashevich P, Mostaghim S (2019) Benchmarking collective perception: New task difficulty metrics for collective decision-making. In: Progress in Artificial Intelligence, Springer International Publishing, pp 699–711, [https://doi.org/10.1007/978-3-030-30241-2\\_58](https://doi.org/10.1007/978-3-030-30241-2_58)
- Gini C (1921) Measurement of inequality of incomes. The Economic Journal 31(121):124–126, <http://dx.doi.org/10.2307/2223319>
